# Supplementary material for: Wide-Targeted Metabolome Analysis Identifies Potential Biomarkers for Prognosis Prediction of Epithelial Ovarian Cancer
Source: MDPI journal article supplement (doi:10.3390/toxins13070461), 2021-06-30
Supplement: s1 [file s1]

# Supplementary Materials: Wide-Targeted Metabolome Analysis Identifies Potential Biomarkers for Prognosis Prediction of Epithelial Ovarian Cancer

Eiji Hishinuma, Muneaki Shimada, Naomi Matsukawa, Daisuke Saigusa, Bin Li, Kei Kudo, Keita Tsuji, Shogo Shigeta, Hideki Tokunaga, Kazuki Kumada, Keigo Komine, Hidekazu Shiota, Yuichi Aoki, Ikuko N. Motoike, Jun Yasuda, Kengo Kinoshita, Masayuki Yamamoto, Seizo Koshiba and Nobuo Yaegashi

**Table S1.** Significantly increased metabolites in the plasma of epithelial ovarian cancer patients.

| Metabolite     | Class                   | Cancer ( $\mu\text{M}$ , mean $\pm$ SD) | Cohort ( $\mu\text{M}$ , mean $\pm$ SD) | <i>p</i> -value        | Fold change (Cancer/Cohort) |
|----------------|-------------------------|-----------------------------------------|-----------------------------------------|------------------------|-----------------------------|
| TG (16:0_40:6) | Triglycerides           | 2.72 $\pm$ 1.51                         | 1.05 $\pm$ 0.45                         | $1.43 \times 10^{-16}$ | 2.58                        |
| Hypoxanthine   | Nucleobases and related | 9.43 $\pm$ 22.55                        | 3.88 $\pm$ 2.17                         | $4.44 \times 10^{-2}$  | 2.43                        |
| Cortisol       | Hormones and related    | 0.31 $\pm$ 0.10                         | 0.16 $\pm$ 0.06                         | $4.35 \times 10^{-24}$ | 1.94                        |
| TG (18:1_36:2) | Triglycerides           | 64.19 $\pm$ 33.17                       | 36.42 $\pm$ 22.01                       | $3.89 \times 10^{-9}$  | 1.76                        |
| TG (22:5_34:2) | Triglycerides           | 1.94 $\pm$ 0.85                         | 1.11 $\pm$ 0.63                         | $1.40 \times 10^{-11}$ | 1.75                        |
| TG (18:2_36:2) | Triglycerides           | 29.32 $\pm$ 15.10                       | 17.18 $\pm$ 11.01                       | $3.33 \times 10^{-8}$  | 1.71                        |
| TG (18:1_34:1) | Triglycerides           | 193.84 $\pm$ 98.13                      | 114.61 $\pm$ 71.77                      | $3.04 \times 10^{-8}$  | 1.69                        |
| TG (18:1_36:3) | Triglycerides           | 52.68 $\pm$ 27.98                       | 31.15 $\pm$ 20.70                       | $1.29 \times 10^{-7}$  | 1.69                        |
| TG (20:4_34:1) | Triglycerides           | 5.49 $\pm$ 2.33                         | 3.31 $\pm$ 2.16                         | $3.19 \times 10^{-9}$  | 1.66                        |
| TG (16:0_36:2) | Triglycerides           | 99.75 $\pm$ 50.83                       | 60.19 $\pm$ 38.32                       | $1.13 \times 10^{-7}$  | 1.66                        |
| TG (16:0_36:3) | Triglycerides           | 99.69 $\pm$ 48.48                       | 60.21 $\pm$ 37.58                       | $4.34 \times 10^{-8}$  | 1.66                        |
| TG (18:2_34:1) | Triglycerides           | 99.06 $\pm$ 47.69                       | 59.91 $\pm$ 36.66                       | $3.15 \times 10^{-8}$  | 1.65                        |
| GLCAS          | Bile acids              | 0.27 $\pm$ 0.27                         | 0.16 $\pm$ 0.14                         | $2.60 \times 10^{-3}$  | 1.65                        |
| TG (18:0_36:3) | Triglycerides           | 9.82 $\pm$ 4.43                         | 5.98 $\pm$ 3.64                         | $9.19 \times 10^{-9}$  | 1.64                        |
| TG (18:1_34:2) | Triglycerides           | 110.15 $\pm$ 52.06                      | 67.77 $\pm$ 40.23                       | $4.23 \times 10^{-8}$  | 1.63                        |
| TG (18:0_36:2) | Triglycerides           | 8.60 $\pm$ 3.94                         | 5.30 $\pm$ 3.53                         | $4.79 \times 10^{-8}$  | 1.62                        |
| SM C26:1       | Sphingomyelins          | 1.74 $\pm$ 0.81                         | 1.08 $\pm$ 0.33                         | $1.78 \times 10^{-10}$ | 1.62                        |
| TG (18:2_36:1) | Triglycerides           | 10.62 $\pm$ 4.89                        | 6.65 $\pm$ 4.10                         | $7.12 \times 10^{-8}$  | 1.60                        |
| TG (18:1_36:1) | Triglycerides           | 17.47 $\pm$ 8.41                        | 10.97 $\pm$ 7.18                        | $3.18 \times 10^{-7}$  | 1.59                        |
| TG (18:2_35:1) | Triglycerides           | 1.64 $\pm$ 0.79                         | 1.07 $\pm$ 0.50                         | $1.95 \times 10^{-8}$  | 1.53                        |

|                      |                    |               |               |                         |      |
|----------------------|--------------------|---------------|---------------|-------------------------|------|
| TG (18:2_34:2)       | Triglycerides      | 50.08 ± 25.05 | 32.81 ± 21.08 | 5.24 × 10 <sup>-6</sup> | 1.53 |
| TG (18:2_34:0)       | Triglycerides      | 9.98 ± 4.60   | 6.65 ± 4.74   | 9.41 × 10 <sup>-6</sup> | 1.50 |
| TG (22:5_34:1)       | Triglycerides      | 4.30 ± 2.00   | 2.88 ± 1.28   | 3.10 × 10 <sup>-9</sup> | 1.49 |
| TG (16:1_36:2)       | Triglycerides      | 13.15 ± 6.87  | 8.83 ± 5.25   | 1.09 × 10 <sup>-5</sup> | 1.49 |
| TG (18:2_36:3)       | Triglycerides      | 19.71 ± 11.82 | 13.29 ± 10.31 | 3.42 × 10 <sup>-4</sup> | 1.48 |
| TG (18:1_35:2)       | Triglycerides      | 3.20 ± 1.57   | 2.21 ± 0.97   | 7.02 × 10 <sup>-7</sup> | 1.45 |
| TG (16:0_36:4)       | Triglycerides      | 28.20 ± 14.55 | 19.99 ± 14.03 | 3.74 × 10 <sup>-4</sup> | 1.41 |
| TG (17:2_38:6)       | Triglycerides      | 0.35 ± 0.17   | 0.25 ± 0.13   | 5.18 × 10 <sup>-5</sup> | 1.39 |
| TG (17:2_38:5)       | Triglycerides      | 0.37 ± 0.16   | 0.26 ± 0.14   | 1.09 × 10 <sup>-4</sup> | 1.39 |
| TG (22:6_32:1)       | Triglycerides      | 1.78 ± 1.06   | 1.32 ± 1.53   | 7.41 × 10 <sup>-3</sup> | 1.35 |
| Kynurenine           | Amino acid related | 2.04 ± 0.87   | 1.52 ± 0.57   | 1.25 × 10 <sup>-5</sup> | 1.35 |
| TG (18:1_33:1)       | Triglycerides      | 3.74 ± 1.93   | 2.80 ± 1.35   | 1.23 × 10 <sup>-4</sup> | 1.34 |
| HCys                 | Amino acid related | 27.69 ± 17.04 | 20.80 ± 12.81 | 4.37 × 10 <sup>-3</sup> | 1.33 |
| C18:1                | Acylcarnitines     | 0.11 ± 0.05   | 0.09 ± 0.03   | 9.05 × 10 <sup>-3</sup> | 1.32 |
| TG (18:2_33:1)       | Triglycerides      | 1.95 ± 0.82   | 1.47 ± 0.65   | 4.51 × 10 <sup>-6</sup> | 1.32 |
| TG (17:0_36:3)       | Triglycerides      | 1.51 ± 0.69   | 1.15 ± 0.51   | 9.40 × 10 <sup>-5</sup> | 1.32 |
| TG (18:1_32:1)       | Triglycerides      | 32.05 ± 16.03 | 24.39 ± 17.21 | 4.11 × 10 <sup>-3</sup> | 1.31 |
| TG (18:1_36:4)       | Triglycerides      | 15.92 ± 9.03  | 12.18 ± 8.52  | 7.91 × 10 <sup>-3</sup> | 1.31 |
| TG (16:1_34:1)       | Triglycerides      | 17.85 ± 8.15  | 13.70 ± 10.25 | 1.13 × 10 <sup>-2</sup> | 1.30 |
| TG (20:4_34:2)       | Triglycerides      | 2.89 ± 1.12   | 2.22 ± 1.55   | 4.54 × 10 <sup>-4</sup> | 1.30 |
| TG (18:0_36:4)       | Triglycerides      | 3.79 ± 1.68   | 2.91 ± 1.62   | 7.98 × 10 <sup>-4</sup> | 1.30 |
| TG (16:0_34:2)       | Triglycerides      | 36.37 ± 17.48 | 28.27 ± 23.18 | 1.36 × 10 <sup>-2</sup> | 1.29 |
| TG (16:0_40:7)       | Triglycerides      | 1.80 ± 1.47   | 1.40 ± 0.95   | 1.19 × 10 <sup>-2</sup> | 1.29 |
| t4-OH-Pro            | Amino acid related | 9.99 ± 4.72   | 7.77 ± 2.41   | 2.50 × 10 <sup>-4</sup> | 1.29 |
| Cer (d18:1/24:1)     | Ceramides          | 2.13 ± 0.56   | 1.66 ± 0.34   | 1.11 × 10 <sup>-9</sup> | 1.29 |
| Hex2Cer (d18:1/24:1) | Dihexosylceramides | 0.51 ± 0.17   | 0.40 ± 0.11   | 3.00 × 10 <sup>-5</sup> | 1.28 |
| TG (20:4_36:4)       | Triglycerides      | 0.69 ± 0.27   | 0.54 ± 0.29   | 1.31 × 10 <sup>-3</sup> | 1.28 |
| TG (16:1_36:1)       | Triglycerides      | 2.47 ± 1.03   | 1.94 ± 1.05   | 1.24 × 10 <sup>-4</sup> | 1.28 |
| TG (20:2_34:1)       | Triglycerides      | 1.33 ± 0.54   | 1.05 ± 0.54   | 1.04 × 10 <sup>-4</sup> | 1.27 |
| DG (18:2_18:2)       | Diglycerides       | 3.90 ± 1.78   | 3.06 ± 1.47   | 5.72 × 10 <sup>-4</sup> | 1.27 |
| TG (18:2_38:5)       | Triglycerides      | 1.34 ± 0.53   | 1.06 ± 0.39   | 1.77 × 10 <sup>-4</sup> | 1.27 |

|                     |                    |                |                |                         |      |
|---------------------|--------------------|----------------|----------------|-------------------------|------|
| TG (20:4_36:2)      | Triglycerides      | 2.52 ± 0.98    | 1.99 ± 0.86    | 1.26 × 10 <sup>-4</sup> | 1.26 |
| TG (16:1_36:3)      | Triglycerides      | 11.34 ± 5.51   | 9.01 ± 4.74    | 5.17 × 10 <sup>-4</sup> | 1.26 |
| beta-Ala            | Biogenic amines    | 2.03 ± 1.13    | 1.63 ± 1.15    | 2.58 × 10 <sup>-2</sup> | 1.25 |
| TG (18:1_32:0)      | Triglycerides      | 25.61 ± 12.88  | 20.53 ± 19.35  | 3.96 × 10 <sup>-2</sup> | 1.25 |
| TG (20:5_34:1)      | Triglycerides      | 2.15 ± 1.01    | 1.72 ± 1.36    | 1.02 × 10 <sup>-2</sup> | 1.25 |
| TG (18:0_34:2)      | Triglycerides      | 6.28 ± 2.57    | 5.06 ± 3.78    | 1.09 × 10 <sup>-2</sup> | 1.24 |
| TG (18:1_35:3)      | Triglycerides      | 0.92 ± 0.49    | 0.74 ± 0.29    | 1.88 × 10 <sup>-3</sup> | 1.24 |
| TG (17:2_36:4)      | Triglycerides      | 0.71 ± 0.35    | 0.58 ± 0.34    | 7.78 × 10 <sup>-3</sup> | 1.24 |
| Thr                 | Amino acids        | 138.81 ± 45.28 | 112.52 ± 24.63 | 1.02 × 10 <sup>-5</sup> | 1.23 |
| CE (22:5)           | Cholesteryl esters | 2.88 ± 1.79    | 2.34 ± 1.14    | 1.13 × 10 <sup>-2</sup> | 1.23 |
| TG (16:1_34:2)      | Triglycerides      | 10.41 ± 4.35   | 8.49 ± 5.77    | 3.12 × 10 <sup>-2</sup> | 1.23 |
| TG (18:3_34:3)      | Triglycerides      | 0.97 ± 0.52    | 0.80 ± 0.47    | 2.24 × 10 <sup>-2</sup> | 1.22 |
| TG (18:2_32:1)      | Triglycerides      | 13.91 ± 6.42   | 11.54 ± 7.68   | 3.61 × 10 <sup>-2</sup> | 1.20 |
| TG (18:2_36:0)      | Triglycerides      | 1.01 ± 0.43    | 0.86 ± 0.48    | 3.58 × 10 <sup>-3</sup> | 1.17 |
| SDMA                | Amino acid related | 0.54 ± 0.17    | 0.46 ± 0.08    | 2.86 × 10 <sup>-4</sup> | 1.17 |
| Asp                 | Amino acids        | 7.19 ± 4.39    | 6.15 ± 1.22    | 4.16 × 10 <sup>-2</sup> | 1.17 |
| ADMA                | Amino acid related | 0.52 ± 0.10    | 0.45 ± 0.13    | 1.67 × 10 <sup>-4</sup> | 1.16 |
| Ile                 | Amino acids        | 73.33 ± 20.92  | 64.53 ± 18.19  | 5.08 × 10 <sup>-3</sup> | 1.14 |
| SM C18:0            | Sphingomyelins     | 41.84 ± 10.99  | 37.00 ± 8.32   | 2.01 × 10 <sup>-3</sup> | 1.13 |
| TG (18:3_34:0)      | Triglycerides      | 1.11 ± 0.53    | 0.98 ± 0.62    | 2.02 × 10 <sup>-2</sup> | 1.13 |
| Gly                 | Amino acids        | 271.08 ± 82.02 | 240.34 ± 78.47 | 1.66 × 10 <sup>-2</sup> | 1.13 |
| C16:1               | Acylcarnitines     | 0.04 ± 0.02    | 0.03 ± 0.01    | 2.41 × 10 <sup>-3</sup> | 1.13 |
| TG (16:0_38:2)      | Triglycerides      | 1.35 ± 0.78    | 1.21 ± 0.81    | 3.87 × 10 <sup>-2</sup> | 1.11 |
| TG (20:4_32:0)      | Triglycerides      | 0.92 ± 0.43    | 0.83 ± 0.63    | 3.22 × 10 <sup>-2</sup> | 1.11 |
| TG (16:0_38:3)      | Triglycerides      | 1.55 ± 0.78    | 1.40 ± 0.83    | 4.42 × 10 <sup>-2</sup> | 1.11 |
| Hex2Cer(d18:1/16:0) | Dihexosylceramides | 1.99 ± 0.56    | 1.80 ± 0.39    | 1.12 × 10 <sup>-2</sup> | 1.11 |
| Lys                 | Amino acids        | 186.06 ± 46.15 | 169.93 ± 47.05 | 3.01 × 10 <sup>-2</sup> | 1.09 |
| Cer(d18:1/25:0)     | Ceramides          | 0.37 ± 0.09    | 0.34 ± 0.10    | 2.73 × 10 <sup>-2</sup> | 1.09 |

**Table S2.** Significantly decreased metabolites in the plasma of epithelial ovarian cancer patients.

| Metabolite      | Class                    | Cancer ( $\mu\text{M}$ , mean $\pm$ SD) | Cohort ( $\mu\text{M}$ , mean $\pm$ SD) | <i>p</i> -value        | Fold change (Cancer/Cohort) |
|-----------------|--------------------------|-----------------------------------------|-----------------------------------------|------------------------|-----------------------------|
| PC ae C38:2     | Phosphatidylcholines     | 2.39 $\pm$ 2.14                         | 7.00 $\pm$ 1.29                         | $6.15 \times 10^{-37}$ | 0.34                        |
| Serotonin       | Biogenic amines          | 0.12 $\pm$ 0.08                         | 0.30 $\pm$ 0.20                         | $8.01 \times 10^{-12}$ | 0.40                        |
| CE (20:5)       | Cholesteryl esters       | 61.64 $\pm$ 39.16                       | 144.24 $\pm$ 106.50                     | $9.43 \times 10^{-10}$ | 0.43                        |
| DHA             | Fatty acids              | 12.03 $\pm$ 16.07                       | 26.67 $\pm$ 34.72                       | $7.86 \times 10^{-4}$  | 0.45                        |
| PC ae C38:3     | Phosphatidylcholines     | 4.35 $\pm$ 1.93                         | 9.54 $\pm$ 1.84                         | $1.80 \times 10^{-38}$ | 0.46                        |
| PC aa C40:2     | Phosphatidylcholines     | 0.24 $\pm$ 0.16                         | 0.50 $\pm$ 0.13                         | $4.76 \times 10^{-22}$ | 0.47                        |
| PC ae C40:3     | Phosphatidylcholines     | 1.55 $\pm$ 0.75                         | 3.07 $\pm$ 0.72                         | $8.18 \times 10^{-27}$ | 0.50                        |
| PC ae C38:1     | Phosphatidylcholines     | 1.22 $\pm$ 1.19                         | 2.34 $\pm$ 1.03                         | $1.52 \times 10^{-9}$  | 0.52                        |
| AA              | Fatty acids              | 1.76 $\pm$ 1.20                         | 3.29 $\pm$ 2.32                         | $1.10 \times 10^{-6}$  | 0.54                        |
| Cer(d18:2/23:0) | Ceramides                | 0.12 $\pm$ 0.06                         | 0.21 $\pm$ 0.13                         | $1.96 \times 10^{-8}$  | 0.55                        |
| PC aa C42:4     | Phosphatidylcholines     | 0.15 $\pm$ 0.05                         | 0.26 $\pm$ 0.13                         | $8.63 \times 10^{-12}$ | 0.56                        |
| TG (22:6_34:3)  | Triglycerides            | 0.82 $\pm$ 0.74                         | 1.42 $\pm$ 0.95                         | $1.80 \times 10^{-3}$  | 0.58                        |
| PC aa C34:4     | Phosphatidylcholines     | 0.50 $\pm$ 0.26                         | 0.84 $\pm$ 0.24                         | $1.02 \times 10^{-14}$ | 0.60                        |
| CE (18:3)       | Cholesteryl esters       | 37.41 $\pm$ 18.70                       | 60.12 $\pm$ 22.13                       | $6.58 \times 10^{-11}$ | 0.62                        |
| PC ae C40:1     | Phosphatidylcholines     | 0.68 $\pm$ 0.29                         | 1.09 $\pm$ 0.26                         | $7.94 \times 10^{-17}$ | 0.62                        |
| PC aa C42:2     | Phosphatidylcholines     | 0.23 $\pm$ 0.09                         | 0.36 $\pm$ 0.10                         | $1.43 \times 10^{-16}$ | 0.62                        |
| C14:1           | Acylcarnitines           | 0.04 $\pm$ 0.02                         | 0.06 $\pm$ 0.02                         | $2.12 \times 10^{-11}$ | 0.64                        |
| PC aa C40:3     | Phosphatidylcholines     | 0.59 $\pm$ 0.26                         | 0.92 $\pm$ 0.25                         | $8.64 \times 10^{-14}$ | 0.64                        |
| PC ae C44:3     | Phosphatidylcholines     | 0.08 $\pm$ 0.03                         | 0.13 $\pm$ 0.04                         | $6.63 \times 10^{-15}$ | 0.65                        |
| TrpBetaine      | Amino acid related       | 0.11 $\pm$ 0.14                         | 0.17 $\pm$ 0.18                         | $2.60 \times 10^{-2}$  | 0.65                        |
| PC aa C36:0     | Phosphatidylcholines     | 2.10 $\pm$ 1.02                         | 3.22 $\pm$ 1.29                         | $6.90 \times 10^{-9}$  | 0.65                        |
| lysoPC a C20:3  | Lysophosphatidylcholines | 0.87 $\pm$ 0.32                         | 1.31 $\pm$ 0.45                         | $1.64 \times 10^{-11}$ | 0.66                        |
| PC ae C40:4     | Phosphatidylcholines     | 1.27 $\pm$ 0.43                         | 1.93 $\pm$ 0.42                         | $4.96 \times 10^{-18}$ | 0.66                        |
| lysoPC a C24:0  | Lysophosphatidylcholines | 0.15 $\pm$ 0.04                         | 0.22 $\pm$ 0.06                         | $7.78 \times 10^{-15}$ | 0.67                        |
| PC aa C36:6     | Phosphatidylcholines     | 0.49 $\pm$ 0.27                         | 0.74 $\pm$ 0.29                         | $1.37 \times 10^{-7}$  | 0.67                        |
| PC ae C42:1     | Phosphatidylcholines     | 0.22 $\pm$ 0.06                         | 0.32 $\pm$ 0.06                         | $3.61 \times 10^{-21}$ | 0.67                        |
| PC ae C30:2     | Phosphatidylcholines     | 0.45 $\pm$ 0.20                         | 0.67 $\pm$ 0.14                         | $7.98 \times 10^{-13}$ | 0.67                        |

|                          |                          |               |               |                          |      |
|--------------------------|--------------------------|---------------|---------------|--------------------------|------|
| lysoPC a C18:2           | Lysophosphatidylcholines | 11.76 ± 5.74  | 17.49 ± 6.26  | 1.13 × 10 <sup>-8</sup>  | 0.67 |
| p-Cresol-SO <sub>4</sub> | Cresols                  | 14.18 ± 10.97 | 21.05 ± 17.34 | 3.44 × 10 <sup>-3</sup>  | 0.67 |
| lysoPC a C18:0           | Lysophosphatidylcholines | 19.86 ± 8.02  | 29.47 ± 7.54  | 7.28 × 10 <sup>-13</sup> | 0.67 |
| PC ae C42:3              | Phosphatidylcholines     | 0.61 ± 0.21   | 0.90 ± 0.19   | 1.25 × 10 <sup>-16</sup> | 0.67 |
| DHEAS                    | Hormones and related     | 1.57 ± 1.01   | 2.32 ± 1.34   | 8.55 × 10 <sup>-5</sup>  | 0.67 |
| PC ae C42:4              | Phosphatidylcholines     | 0.48 ± 0.23   | 0.71 ± 0.19   | 7.03 × 10 <sup>-11</sup> | 0.68 |
| PC aa C32:2              | Phosphatidylcholines     | 3.38 ± 1.79   | 4.94 ± 0.95   | 1.28 × 10 <sup>-10</sup> | 0.68 |
| PC aa C42:5              | Phosphatidylcholines     | 0.30 ± 0.12   | 0.44 ± 0.12   | 1.71 × 10 <sup>-11</sup> | 0.69 |
| Cer(d18:2/24:0)          | Ceramides                | 0.42 ± 0.16   | 0.60 ± 0.18   | 1.53 × 10 <sup>-10</sup> | 0.70 |
| lysoPC a C16:1           | Lysophosphatidylcholines | 0.98 ± 0.40   | 1.40 ± 0.42   | 8.81 × 10 <sup>-10</sup> | 0.70 |
| PC ae C34:3              | Phosphatidylcholines     | 4.08 ± 1.57   | 5.77 ± 1.55   | 1.55 × 10 <sup>-10</sup> | 0.71 |
| PC ae C42:2              | Phosphatidylcholines     | 0.40 ± 0.15   | 0.56 ± 0.11   | 1.49 × 10 <sup>-11</sup> | 0.72 |
| Cit                      | Amino acid related       | 24.21 ± 8.32  | 33.46 ± 10.69 | 7.45 × 10 <sup>-9</sup>  | 0.72 |
| lysoPC a C28:0           | Lysophosphatidylcholines | 0.15 ± 0.04   | 0.21 ± 0.08   | 2.09 × 10 <sup>-7</sup>  | 0.73 |
| PC aa C40:4              | Phosphatidylcholines     | 2.01 ± 0.56   | 2.76 ± 0.70   | 5.80 × 10 <sup>-12</sup> | 0.73 |
| PC ae C34:2              | Phosphatidylcholines     | 6.19 ± 1.83   | 8.44 ± 2.05   | 1.25 × 10 <sup>-11</sup> | 0.73 |
| PC ae C36:1              | Phosphatidylcholines     | 11.95 ± 3.27  | 16.28 ± 3.19  | 1.54 × 10 <sup>-14</sup> | 0.73 |
| lysoPC a C17:0           | Lysophosphatidylcholines | 1.06 ± 0.49   | 1.45 ± 0.38   | 9.64 × 10 <sup>-8</sup>  | 0.73 |
| PC aa C42:1              | Phosphatidylcholines     | 0.25 ± 0.09   | 0.34 ± 0.09   | 5.09 × 10 <sup>-9</sup>  | 0.74 |
| PC ae C38:0              | Phosphatidylcholines     | 1.17 ± 0.47   | 1.58 ± 0.43   | 2.98 × 10 <sup>-8</sup>  | 0.74 |
| PC ae C40:5              | Phosphatidylcholines     | 2.69 ± 0.77   | 3.64 ± 0.90   | 2.43 × 10 <sup>-11</sup> | 0.74 |
| TG (17:0_34:1)           | Triglycerides            | 0.97 ± 0.33   | 1.31 ± 0.63   | 1.98 × 10 <sup>-4</sup>  | 0.74 |
| PC ae C36:3              | Phosphatidylcholines     | 3.75 ± 1.13   | 5.02 ± 1.11   | 2.63 × 10 <sup>-11</sup> | 0.75 |
| SM C24:0                 | Sphingomyelins           | 23.60 ± 5.43  | 31.41 ± 6.45  | 4.81 × 10 <sup>-14</sup> | 0.75 |
| PC aa C32:3              | Phosphatidylcholines     | 0.74 ± 0.24   | 0.98 ± 0.20   | 1.94 × 10 <sup>-10</sup> | 0.76 |
| PC ae C38:6              | Phosphatidylcholines     | 4.45 ± 1.56   | 5.87 ± 1.51   | 2.75 × 10 <sup>-8</sup>  | 0.76 |
| lysoPC a C26:1           | Lysophosphatidylcholines | 0.09 ± 0.03   | 0.12 ± 0.04   | 9.38 × 10 <sup>-7</sup>  | 0.76 |
| TG (20:3_36:4)           | Triglycerides            | 0.28 ± 0.14   | 0.37 ± 0.22   | 1.36 × 10 <sup>-3</sup>  | 0.76 |
| lysoPC a C18:1           | Lysophosphatidylcholines | 11.75 ± 4.55  | 15.37 ± 4.20  | 5.48 × 10 <sup>-7</sup>  | 0.76 |
| SM C26:0                 | Sphingomyelins           | 0.56 ± 0.16   | 0.73 ± 0.19   | 3.13 × 10 <sup>-9</sup>  | 0.76 |
| lysoPC a C16:0           | Lysophosphatidylcholines | 45.75 ± 16.73 | 59.39 ± 14.31 | 1.22 × 10 <sup>-7</sup>  | 0.77 |

|                  |                          |                |                |                          |      |
|------------------|--------------------------|----------------|----------------|--------------------------|------|
| Cer(d18:2/22:0)  | Ceramides                | 0.32 ± 0.12    | 0.41 ± 0.15    | 2.26 × 10 <sup>-5</sup>  | 0.77 |
| PC ae C36:5      | Phosphatidylcholines     | 6.17 ± 2.05    | 7.97 ± 1.95    | 5.40 × 10 <sup>-8</sup>  | 0.77 |
| PC aa C38:3      | Phosphatidylcholines     | 36.30 ± 9.40   | 46.75 ± 9.53   | 7.56 × 10 <sup>-11</sup> | 0.78 |
| lysoPC a C28:1   | Lysophosphatidylcholines | 0.21 ± 0.07    | 0.26 ± 0.10    | 2.74 × 10 <sup>-5</sup>  | 0.78 |
| PC ae C36:4      | Phosphatidylcholines     | 7.97 ± 2.32    | 10.20 ± 2.42   | 1.74 × 10 <sup>-8</sup>  | 0.78 |
| CE (22:6)        | Cholesteryl esters       | 46.44 ± 23.63  | 59.33 ± 36.59  | 9.93 × 10 <sup>-3</sup>  | 0.78 |
| His              | Amino acids              | 64.02 ± 16.53  | 81.59 ± 11.26  | 5.61 × 10 <sup>-13</sup> | 0.78 |
| lysoPC a C26:0   | Lysophosphatidylcholines | 0.17 ± 0.05    | 0.22 ± 0.08    | 2.02 × 10 <sup>-5</sup>  | 0.79 |
| PC aa C36:5      | Phosphatidylcholines     | 20.93 ± 10.56  | 26.51 ± 12.79  | 3.08 × 10 <sup>-3</sup>  | 0.79 |
| PC aa C38:5      | Phosphatidylcholines     | 33.69 ± 9.66   | 42.66 ± 11.82  | 4.74 × 10 <sup>-7</sup>  | 0.79 |
| PC aa C40:6      | Phosphatidylcholines     | 34.44 ± 10.45  | 43.45 ± 13.17  | 3.77 × 10 <sup>-6</sup>  | 0.79 |
| TG (18:1_38:7)   | Triglycerides            | 0.28 ± 0.15    | 0.35 ± 0.11    | 7.29 × 10 <sup>-4</sup>  | 0.79 |
| SM (OH) C22:2    | Sphingomyelins           | 12.18 ± 2.95   | 15.30 ± 3.54   | 9.42 × 10 <sup>-9</sup>  | 0.80 |
| C2               | Acylcarnitines           | 5.67 ± 2.92    | 7.13 ± 2.72    | 1.76 × 10 <sup>-3</sup>  | 0.80 |
| SM (OH) C24:1    | Sphingomyelins           | 2.56 ± 0.72    | 3.21 ± 0.73    | 6.37 × 10 <sup>-8</sup>  | 0.80 |
| lysoPC a C20:4   | Lysophosphatidylcholines | 2.80 ± 1.11    | 3.51 ± 0.84    | 1.14 × 10 <sup>-5</sup>  | 0.80 |
| PC aa C34:3      | Phosphatidylcholines     | 5.34 ± 2.09    | 6.69 ± 1.66    | 1.22 × 10 <sup>-5</sup>  | 0.80 |
| PC aa C42:0      | Phosphatidylcholines     | 0.54 ± 0.21    | 0.68 ± 0.18    | 3.22 × 10 <sup>-5</sup>  | 0.80 |
| Taurine          | Amino acid related       | 75.51 ± 34.51  | 94.00 ± 24.49  | 1.38 × 10 <sup>-4</sup>  | 0.80 |
| Cer (d18:1/23:0) | Ceramides                | 0.82 ± 0.22    | 1.01 ± 0.26    | 6.28 × 10 <sup>-7</sup>  | 0.81 |
| PC ae C40:2      | Phosphatidylcholines     | 2.11 ± 0.66    | 2.62 ± 0.64    | 2.00 × 10 <sup>-6</sup>  | 0.81 |
| PC ae C30:0      | Phosphatidylcholines     | 0.22 ± 0.07    | 0.27 ± 0.08    | 1.59 × 10 <sup>-5</sup>  | 0.81 |
| PC aa C36:1      | Phosphatidylcholines     | 34.39 ± 8.83   | 42.49 ± 10.48  | 4.09 × 10 <sup>-7</sup>  | 0.81 |
| PC aa C38:0      | Phosphatidylcholines     | 3.02 ± 1.01    | 3.72 ± 1.05    | 3.28 × 10 <sup>-5</sup>  | 0.81 |
| CE (18:0)        | Cholesteryl esters       | 8.46 ± 4.19    | 10.40 ± 3.51   | 3.21 × 10 <sup>-3</sup>  | 0.81 |
| PC aa C28:1      | Phosphatidylcholines     | 2.60 ± 0.71    | 3.18 ± 0.69    | 4.20 × 10 <sup>-7</sup>  | 0.82 |
| CE (20:3)        | Cholesteryl esters       | 14.33 ± 4.25   | 17.52 ± 5.05   | 1.11 × 10 <sup>-4</sup>  | 0.82 |
| PC aa C40:5      | Phosphatidylcholines     | 6.78 ± 1.98    | 8.28 ± 2.41    | 3.06 × 10 <sup>-5</sup>  | 0.82 |
| SM (OH) C22:1    | Sphingomyelins           | 12.63 ± 3.10   | 15.37 ± 3.35   | 2.92 × 10 <sup>-7</sup>  | 0.82 |
| CE (18:1)        | Cholesteryl esters       | 208.33 ± 64.50 | 253.04 ± 65.21 | 2.34 × 10 <sup>-5</sup>  | 0.82 |
| Val              | Amino acids              | 166.82 ± 46.80 | 201.59 ± 40.01 | 1.20 × 10 <sup>-6</sup>  | 0.83 |

|                  |                      |                 |                |                         |      |
|------------------|----------------------|-----------------|----------------|-------------------------|------|
| PC ae C40:6      | Phosphatidylcholines | 3.99 ± 1.30     | 4.80 ± 1.17    | 5.63 × 10 <sup>-5</sup> | 0.83 |
| PC aa C36:3      | Phosphatidylcholines | 67.87 ± 18.73   | 81.50 ± 18.98  | 9.72 × 10 <sup>-6</sup> | 0.83 |
| PC aa C38:6      | Phosphatidylcholines | 90.50 ± 27.54   | 108.56 ± 27.44 | 5.30 × 10 <sup>-5</sup> | 0.83 |
| Trp              | Amino acids          | 43.51 ± 11.89   | 52.17 ± 9.22   | 7.85 × 10 <sup>-7</sup> | 0.83 |
| PC aa C30:0      | Phosphatidylcholines | 3.27 ± 1.11     | 3.92 ± 1.02    | 1.74 × 10 <sup>-4</sup> | 0.83 |
| PC ae C36:2      | Phosphatidylcholines | 8.86 ± 2.32     | 10.59 ± 2.31   | 4.82 × 10 <sup>-6</sup> | 0.84 |
| Cer (d18:1/24:0) | Ceramides            | 2.10 ± 0.58     | 2.50 ± 0.63    | 3.74 × 10 <sup>-5</sup> | 0.84 |
| PC aa C36:2      | Phosphatidylcholines | 168.44 ± 40.84  | 200.78 ± 40.91 | 1.49 × 10 <sup>-6</sup> | 0.84 |
| PC ae C36:0      | Phosphatidylcholines | 0.62 ± 0.18     | 0.74 ± 0.17    | 2.58 × 10 <sup>-5</sup> | 0.84 |
| DG (17:0_18:1)   | Diglycerides         | 0.45 ± 0.16     | 0.53 ± 0.17    | 3.12 × 10 <sup>-3</sup> | 0.84 |
| HArg             | Amino acid related   | 5.30 ± 2.91     | 6.26 ± 1.89    | 1.48 × 10 <sup>-2</sup> | 0.85 |
| PC aa C32:1      | Phosphatidylcholines | 9.44 ± 3.77     | 11.13 ± 3.96   | 6.42 × 10 <sup>-3</sup> | 0.85 |
| TG (18:0_36:5)   | Triglycerides        | 0.73 ± 0.26     | 0.86 ± 0.39    | 2.48 × 10 <sup>-2</sup> | 0.86 |
| PC aa C38:4      | Phosphatidylcholines | 65.39 ± 16.86   | 75.51 ± 16.59  | 1.87 × 10 <sup>-4</sup> | 0.87 |
| PC ae C44:4      | Phosphatidylcholines | 0.26 ± 0.10     | 0.30 ± 0.06    | 3.00 × 10 <sup>-3</sup> | 0.87 |
| PC ae C38:4      | Phosphatidylcholines | 6.22 ± 1.71     | 7.19 ± 1.38    | 1.32 × 10 <sup>-4</sup> | 0.87 |
| PC ae C42:5      | Phosphatidylcholines | 1.55 ± 0.46     | 1.77 ± 0.38    | 1.81 × 10 <sup>-4</sup> | 0.87 |
| PC ae C32:1      | Phosphatidylcholines | 1.66 ± 0.44     | 1.88 ± 0.39    | 1.16 × 10 <sup>-3</sup> | 0.88 |
| CE (20:4)        | Cholesteryl esters   | 139.76 ± 52.16  | 157.98 ± 51.80 | 2.80 × 10 <sup>-2</sup> | 0.88 |
| CE (16:0)        | Cholesteryl esters   | 131.34 ± 37.06  | 148.25 ± 35.19 | 3.56 × 10 <sup>-3</sup> | 0.89 |
| PC ae C38:5      | Phosphatidylcholines | 9.23 ± 2.33     | 10.37 ± 2.00   | 1.12 × 10 <sup>-3</sup> | 0.89 |
| PC ae C32:2      | Phosphatidylcholines | 0.89 ± 0.24     | 0.99 ± 0.22    | 4.22 × 10 <sup>-3</sup> | 0.89 |
| Tyr              | Amino acids          | 52.74 ± 14.27   | 58.63 ± 12.62  | 6.41 × 10 <sup>-3</sup> | 0.90 |
| PC ae C44:6      | Phosphatidylcholines | 0.88 ± 0.33     | 0.97 ± 0.23    | 3.17 × 10 <sup>-2</sup> | 0.90 |
| Gln              | Amino acids          | 648.70 ± 124.61 | 689.46 ± 94.32 | 2.09 × 10 <sup>-2</sup> | 0.94 |
